1 **Title:** Transcranial magnetic stimulation of the occipital cortex interferes with foot  
2 movements in blind individuals

3  
4 **Authors:** Tsuyoshi Ikegami<sup>1,2\*</sup>, Masaya Hirashima<sup>1,2</sup>, Eiichi Naito<sup>1,2</sup>, Satoshi Hirose<sup>1,3</sup>

5  
6 **Affiliations:**

7 <sup>1</sup>Center for Information and Neural Networks (CiNet), Advanced ICT Research Institute,  
8 National Institute of Information and Communications Technology, 1-4, Yamadaoka,  
9 Suita City, Osaka, Japan

10 <sup>2</sup> Graduate School of Frontier Biosciences, Osaka University, 1-3, Yamadaoka, Suita,  
11 Osaka, Japan

12 <sup>3</sup> Otemon Gakuin University, Faculty of Psychology, 2-1-15, Nishiai, Ibaraki City, Osaka,  
13 Japan

14 (\*corresponding author)

15  
16 **Corresponding author:**

17 \*Correspondence should be addressed to Tsuyoshi Ikegami ([ikegami244@gmail.com](mailto:ikegami244@gmail.com)).

18  
19 **Acknowledgments:** We thank Dr. Kaoru Amano and Dr. Nobuhiro Hagura for their  
20 valuable comments on this manuscript. We thank Ms. Naoko Katagiri and Dr. Kenta  
21 Yamamoto for their help in conducting the experiments. We thank Mr. Shigeo Murakami  
22 of the Japanese Blind Football Association for his help in recruiting participants. TI was  
23 supported by JSPS KAKENHI Grant #16K12974. EN was supported by JSPS KAKENHI  
24 Grant #JP19H05723.

25  
26 **Competing interests:**

27 The authors declare no competing financial interests.

28

29 **Abstract**

30 Research in blind individuals has shown that after visual loss, the occipital cortex can be  
31 reorganized and repurposed for nonvisual perception and cognitive functions. However,  
32 no studies have directly examined the involvement of the visual cortex in motor function.  
33 Here, we show that a rhythmic foot movement performed by blind individuals can be  
34 disrupted by transcranial magnetic stimulation (TMS) to their primary and secondary  
35 visual cortex (V1/V2). This disruptive effect of TMS was absent for sighted participants.  
36 Our result suggests that the visual cortex of blind individuals is involved in sensorimotor  
37 control. This is the first experimental evidence that functional repurposing of the human  
38 visual cortex is not be restricted to perception and cognitive functions, but also extends  
39 to motor function.

40

41 **Introduction**

42 Sensory loss can lead to dramatic plasticity of the cerebral cortex (Merabet et al., 2005,  
43 Merabet and Pascual-Leone, 2010). There is accumulating evidence for cross-modal  
44 plasticity after visual loss, where the visual cortex is reorganized to participate in the  
45 remaining sensory modalities. For example, the visual cortex of blind individuals  
46 responds to auditory (Kujala et al., 1995, Weeks et al., 2000, Amadeo et al., 2019, Vetter  
47 et al., 2020) and tactile stimuli (Sadato et al., 1996, Cohen et al., 1997, Burton et al., 2002,  
48 Pietrini et al., 2004, Ptito et al., 2008). This cross-modal plasticity has been regarded as  
49 the neural underpinnings driving blind individuals' superior ability over sighted  
50 individuals in nonvisual perception like sound localization and tactile spatial  
51 discrimination (Lessard et al., 1998, Roder et al., 1999, Goldreich and Kanics, 2003, Voss  
52 et al., 2004). Furthermore, researchers have suggested that the visual cortex can also be  
53 reorganized to contribute to higher cognitive processes like verbal memory, language  
54 processing, and mathematical processing (Amedi et al., 2003, Amedi et al., 2004, Bedny  
55 et al., 2011, Kanjlia et al., 2016). Thus, the visual cortex of blind individuals takes a more  
56 prominent role in nonvisual perception and cognitive functions than the visual cortex of  
57 sighted individuals.

58

59 Despite this understanding, surprisingly few studies have examined whether the visual  
60 cortex can be reorganized to contribute to sensorimotor control. Previous studies have  
61 reported that the primary visual cortex (V1) of blind individuals can be recruited for  
62 cognitive tasks involving motor output like braille reading tasks (Sadato et al., 1996,  
63 Cohen et al., 1997, Burton et al., 2002). However, the recruitment of V1 has been  
64 attributed to their nonvisual perception or cognitive function, but not motor function. To

65 our knowledge, only one study has suggested that the visual cortex may be reorganized  
66 to participate in sensorimotor control involving the spared sensory modalities, with blind  
67 opossums being superior to sighted ones in somatosensory-based motor control during  
68 ladder-rung walking (Englund et al., 2020). The direct evidence in humans is, however,  
69 still lacking.

70

71 To directly test the possibility that the visual cortex can be reorganized for sensorimotor  
72 control, we applied transcranial magnetic stimulation (TMS) to the occipital cortex,  
73 including the primary and secondary visual cortex (V1/V2), of blind participants during  
74 a rhythmic foot movement. We found that TMS of the occipital cortex increases the  
75 variability of this foot movement in the blind participants but not in sighted controls. Our  
76 results suggest that the visual cortex of blind individuals is reorganized to contribute to  
77 sensorimotor control.

78

## 79 **Results**

80 Twelve acquired blind participants, including six athletes (current or former members of  
81 the Japanese national blind football team; see Methods), and twelve age-matched sighted  
82 participants participated in the experiment (see Table 1 for participant characteristics).  
83 Blindfolded participants in both groups made rhythmic movements of alternating  
84 dorsiflexion and plantar flexion of the feet (Fig. 1A) without any sound cue. We selected  
85 this rhythmic and alternating lower limb movement because it can be easily performed  
86 without vision. The participants were instructed to keep their movement frequency (1 Hz)  
87 as constant as possible.

88

89 During the movement, 20 single TMS pulses were applied to one of 14 stimulation sites  
90 over the occipital cortex (Fig. 1B) with 2–4 s interstimulus intervals (see Methods for  
91 details). The intensity of TMS used in the experiment was comparable between the blind  
92 (mean  $\pm$  standard deviation across participants; 77.083%  $\pm$  11.968% of the maximum  
93 stimulator output) and sighted (84.583%  $\pm$  9.643%) groups (unpaired t-test:  $t_{22} = 1.691$ ,  
94  $p = 0.105$  without correction). In addition, no-stimulation trials were conducted in which  
95 the participants performed the same movements without TMS. We evaluated the effects  
96 of TMS on the rhythmic foot movement by quantifying the variability of the movement  
97 frequency with the standard deviation (SD) of the cycle duration (Fig. 1A, see Methods  
98 for details). We did not observe any immediate motor effects of TMS, such as muscle  
99 twitching or movement stops. We also did not find any TMS effect specific to movement  
100 phases of the cycle. Our main target area in this study was the early visual cortex. Thus,

101 the results we show in the main text are limited to stimulation site #11 (see Fig. 1B),  
102 which corresponds to the putative V1/V2 (pV1/V2). Supplementary Fig. S1 reports the  
103 average SD over all stimulation sites, covering broader visual areas.

104

105 We first confirmed that both groups of participants successfully performed the instructed  
106 movement. The average movement frequency frequencies over all trials in the stimulation  
107 and no-stimulation conditions were  $0.942 \pm 0.168$  Hz and  $0.968 \pm 0.163$  Hz for the blind  
108 and sighted groups, respectively. Importantly, no significant difference was found  
109 between the groups (unpaired t-test:  $t_{22} = 0.381$ ,  $p = 0.707$  without correction).

110

111 We did, however, find distinct group differences in the effect of TMS on movement  
112 performance. TMS to pV1/V2 interfered with the foot movements in the blind group (blue  
113 bars in Fig. 2) but not in the sighted group (red bars in Fig. 2). We performed a two-way  
114 mixed-design analysis of variance (ANOVA) on the SD with a within-subject factor of  
115 stimulation condition (no-stimulation vs. stimulation to pV1/V2) and a between-subject  
116 factor of group (blind vs. sighted). We found neither a significant main effect of  
117 stimulation condition ( $F_{1,22} = 2.195$ ,  $p = 0.153$ ,  $\eta_p^2 = 0.088$ ) nor a significant main effect  
118 of group ( $F_{1,22} = 2.133$ ,  $p = 0.158$ ,  $\eta_p^2 = 0.091$ ). However, we observed a significant  
119 interaction ( $F_{1,22} = 4.318$ ,  $p = 4.959 \times 10^{-3}$ ,  $\eta_p^2 = 0.164$ ). Given the significant interaction,  
120 we first examined the effect of stimulation condition within each group. We found that  
121 TMS to pV1/V2 increased the SD in the blind group compared with the no-stimulation  
122 condition (paired t-test:  $t_{11} = 2.643$ ,  $p = 0.046$  with correction) but not in the sighted group  
123 (paired t-test:  $t_{11} = 0.415$ ,  $p = 0.686$  without correction) (Fig. 2 and Table 2).

124

125 In the blind group, the increase in SD for the TMS was not correlated with their age ( $r =$   
126  $-0.124$ ,  $p = 0.700$ ), the age at onset of visual loss ( $r = -0.040$ ,  $p = 0.902$ ), or the duration  
127 of visual loss ( $r = 0.105$ ,  $p = 0.746$ ). Moreover, this increase in SD did not differ between  
128 the athlete blind ( $BL^A$  in Table 1 and 2, blue solid lines in Fig. 2) and nonathlete blind  
129 subgroups ( $BL^{NA}$ , blue dashed lines; unpaired t-test:  $t_{10} = 0.030$ ,  $p = 0.977$  without  
130 correction).

131

132 Next, we evaluated the effect of group within each stimulation condition given the above  
133 significant interaction. We found no significant difference between the groups in the  
134 stimulation-to-pV1/V2 condition (unpaired t-test:  $t_{22} = 1.068$ ,  $p = 0.297$  without  
135 correction; Fig. 2). In contrast, we observed a trend in the no-stimulation condition where  
136 the SD was smaller in the blind group than the sighted group (unpaired t-test:  $t_{22} = 1.803$ ,

137  $p = 0.085$  without correction; Fig. 2). The lower mean of SD in the blind group was mainly  
138 due to the athlete blind subgroup whose mean (solid blue lines in Fig. 2) was prominently  
139 lower in the no-stimulation condition than the sighted group (red lines; see also  $SD_{\text{no-stim}}$   
140 in Table 2). The SD in the nonathlete blind subgroup (blue dashed lines) was comparable  
141 to the sighted group.

142

143 Finally, when we conducted the same ANOVA on the average SD over all the stimulation  
144 sites (Fig. S1), we found no significant main effect of stimulation condition ( $F_{1,22} = 2.455$ ,  
145  $p = 0.131$ ,  $\eta_p^2 = 0.100$ ) or group ( $F_{1,22} = 2.773$ ,  $p = 0.112$ ,  $\eta_p^2 = 0.112$ ), and no significant  
146 interaction ( $F_{1,22} = 2.397$ ,  $p = 0.136$ ,  $\eta_p^2 = 0.098$ ; Fig. S1).

147

## 148 **Discussion**

149 We showed that TMS to the pV1/V2 disrupts a foot movement task in blind individuals  
150 but not in sighted individuals. Our results provide the first neurobehavioral evidence that  
151 the visual cortex of blind individuals contributes to sensorimotor control. Numerous  
152 studies have reported that the visual cortex of blind individuals is reorganized to  
153 participate in nonvisual perception and cognitive functions (Merabet and Pascual-Leone,  
154 2010, Fine and Park, 2018, Castaldi et al., 2020). Our finding extends the knowledge  
155 about the reorganization of the visual cortex in blind individuals. Specifically, the visual  
156 cortex can be reorganized not only for perceptual and cognitive functions, but also for  
157 motor function.

158

159 We first discuss possible confounders for our results. The disruptive TMS effect (i.e.,  
160 increase in the SD) may have been observed only in the blind group because half of them  
161 were experts in the sensorimotor control of foot movements (i.e., current or former  
162 members of the Japanese national blind football team ( $BL^A$ )). It is true that the baseline  
163 performance in the  $BL^A$  was better than the nonathlete blind subgroup ( $BL^{NA}$ ) or the  
164 sighted group ( $SD_{\text{no-stim}}$  in Table 2). However, note that the disruptive TMS effect ( $\Delta SD$   
165 in Table 2) observed in the  $BL^A$  was also observed in the  $BL^{NA}$  group although the  $BL^{NA}$   
166 group showed a similar baseline performance to the sighted group ( $SD_{\text{no-stim}}$  in Table 2).  
167 Therefore, we claim that the disruptive effect of TMS observed in the blind participants  
168 cannot be attributed to the athletes or their superior baseline performance.

169

170 Another concern is that the disruptive TMS effect in the blind group may be mainly  
171 caused by sensory side effects of TMS, such as tactile (pain) sensations or a clicking

172 sound (Duecker and Sack, 2015). However, this is unlikely. We carefully calibrated the  
173 TMS intensity for each participant so that TMS did not induce pain (see Methods). In  
174 addition, no participant reported any nociceptive feelings, including pain or noisy sounds,  
175 during the experiment. Notably, the TMS intensity used in the experiment did not differ  
176 between the blind and sighted groups (see Results and Table 1). Therefore, the subjective  
177 and objective intensity of the sensory side effects is likely similar between the groups. We  
178 thus argue that the difference of the TMS effect on motor performance between the blind  
179 and sighted groups can be attributed to differences in the neural processing of their visual  
180 cortex during the movement task rather than from sensory side effects of TMS.

181

182 Our results suggest that the engagement of the visual cortex in sensorimotor control does  
183 not depend on the age at onset of blindness, a finding similar to previous reports on the  
184 reorganization for perception and cognitive functions (Burton, 2003, Voss et al., 2006,  
185 Bedny et al., 2012, Holig et al., 2014). Our sample of acquired blind participants covered  
186 a broad range of ages at onset of blindness: five early-blind (age < 6 years), three  
187 intermediate-blind ( $6 \leq \text{age} \leq 16$  years), and four late-blind participants (age > 16 years)  
188 (Voss, 2013, Fine and Park, 2018). Except for one late-blind participant (# 9), all blind  
189 participants showed an increase in the SD when TMS was applied to pV1/V2 (Fig. 2).  
190 Furthermore, we did not find a significant correlation between the increase in SD and the  
191 age at onset of blindness. Thus, the amount of visual experience before the participants  
192 lost their vision appears not to affect the degree of visual cortex engagement.

193

194 However, some visual experience may be necessary to engage the visual cortex in  
195 sensorimotor control. For example, none of the four congenitally blind participants in our  
196 supplementary experiment showed any clear increase in the SD when TMS was applied  
197 to pV1/V2 (Fig. S2, Table S1, and S2). Although we should be cautious due to the limited  
198 sample size, this would suggest the necessity of at least some visual experience for the  
199 neural reorganization.

200

201 We can speculate a possible mechanism for the reorganization of the visual cortex for  
202 sensorimotor control based on our main findings and the preliminary results from the  
203 congenitally blind participants. Visually-guided movements appear early in human  
204 development at around 6-8 months of age (Woodward, 1998, Braddick, 1996, Kanakogi  
205 and Itakura, 2011). This suggests the neural connections between the visual cortex and  
206 sensorimotor regions, which are essential for visually-guided motor control (Gallivan et  
207 al., 2019), are formed at a very early stage of development. However, work in mice



208 suggests that normal visuomotor experiences are necessary for the typical development  
209 of this connection (Leinweber et al., 2017). This neural connection may therefore be  
210 established to some extent through visuomotor experiences before vision loss in both  
211 early- and late-blind individuals, experiences which may not occur in congenitally blind  
212 individuals. Then, after visual loss, the existing neural connections are enhanced and  
213 reorganized (Merabet et al., 2005, Merabet and Pascual-Leone, 2010) for sensorimotor  
214 control of nonvisually-guided movements such as the motor task used in the present study.  
215 Further studies are required to investigate this possible reorganization mechanism by  
216 examining a larger number of congenitally, early-acquired, and late-acquired blind  
217 participants.

218  
219 Although the current study cannot identify the exact functional roles of the visual cortex  
220 of the blind participants in their motor production, we can hypothesize possible roles  
221 based on a computational understanding of sensorimotor control (Scott, 2004). First, the  
222 visual cortex almost certainly does not contribute to the generation of motor commands,  
223 as we observed that TMS did not induce immediate motor effects such as muscle  
224 twitching or movement stops. Instead, our observation of the increased movement  
225 variability may indicate that TMS affected the online estimation of the body state (i.e.,  
226 position, velocity, or movement phase of the foot), which is transformed into motor  
227 commands through motor regions (Todorov and Jordan, 2002, Scott, 2004, Diedrichsen  
228 et al., 2010, Takei et al., 2021). This state estimation is thought to be achieved by  
229 combining sensory feedback and sensory prediction—predicting the sensory consequences  
230 of motor commands (Wolpert and Flanagan, 2001, Shadmehr et al., 2010, Ikegami and  
231 Ganesh, 2017). Many studies on cross-modal plasticity have suggested the visual cortex  
232 in blind individuals processes nonvisual sensory information (Merabet et al., 2005,  
233 Merabet and Pascual-Leone, 2010). Therefore, the visual cortex can receive the nonvisual  
234 (likely proprioceptive) sensory feedback of the foot state. In addition, recent studies in  
235 both sighted mice and humans have provided growing evidence supporting the role of the  
236 visual cortex in predicting the visual consequences of movements (e.g., optical flow)  
237 through the connection between the visual cortex and motor regions (Keller et al., 2012,  
238 Saleem et al., 2013, Leinweber et al., 2017, Buaron et al., 2020). Therefore, if the  
239 connection is reorganized to predict the nonvisual consequences of movements, we  
240 speculate that the visual cortex in blind individuals can contribute to the state estimation  
241 by combining a nonvisual feedback signal and a sensory prediction.

242  
243 We would like to note two methodological limitations of our study. First, we determined

244 stimulation sites (see Methods for additional information) without using a navigation  
245 system guided by magnetic resonance imaging (Amedi et al., 2004). Thus, some between-  
246 participant differences may exist in the anatomical locations of stimulation sites. However,  
247 we focused on the V1/V2, and the corresponding stimulation site (#11) was determined  
248 based on the well-established external anatomical landmark (2.5 cm aboveinion; Beckers  
249 and Zeki, 1995, Cowey and Walsh, 2000, Laycock et al., 2007, Salminen-Vaparanta et al.,  
250 2012). Therefore, we are confident that we stimulated V1/V2 when TMS was applied to  
251 stimulation site #11.

252

253 Second, we cannot deny the concern regarding implicit side effects of TMS. As already  
254 mentioned, none of the participants explicitly claimed nociceptive feelings during the  
255 experiment. The possibility remains, however, that TMS-induced tactile sensations or  
256 TMS clicking sounds implicitly affected the movement performance only in the  
257 (acquired) blind participants. Further studies are required on the implicit attention of blind  
258 individuals to TMS-induced nonvisual sensations to address this concern.

259

260 In conclusion, our study is the first to provide neurobehavioral evidence that the visual  
261 cortex of blind individuals contributes to sensorimotor control. Our findings indicate that  
262 the human brain's plasticity after sensory loss is more flexible than previously thought—  
263 functional repurposing of the lower sensory cortices is not be restricted to perception and  
264 cognitive functions but also extends to motor function. This plasticity may increase the  
265 neural resources available for sensorimotor control in blind individuals and help them  
266 navigate or interact with the ever-changing and diverse environment around us without  
267 vision.

268

## 269 **Methods**

### 270 *Participants*

271 Twelve acquired blind (i.e., lost vision after birth (blind group: BL in Table 1)) and twelve  
272 age-matched sighted (sighted group: SI) individuals with normal or corrected-to-normal  
273 vision participated in the experiment. All participants were healthy male volunteers  
274 without a history of cognitive impairment or psychiatric disorders. They all presented no  
275 contraindications to TMS as assessed using a screening questionnaire in compliance with  
276 the guidelines for noninvasive magnetic brain stimulation in research applications. The  
277 blind group consisted of two subgroups: athlete (BL<sup>A</sup> in Table 1) and nonathlete (BL<sup>NA</sup>  
278 in Table 1). The six blind participants in the BL<sup>A</sup> subgroup were current or former  
279 members of the Japanese national blind football team. The remaining six in the BL<sup>NA</sup>



280 subgroup were blind individuals from the general population. All sighted participants  
281 were from the general population. We selected the sample size ( $n = 12$  per group) based  
282 on previous works that examined the effect of TMS on motor tasks (Foltys et al., 2001,  
283 Orban de Xivry et al., 2011a, Orban de Xivry et al., 2011b, Mawase et al., 2017). The  
284 experiment was approved by the ethics committee of the National Institute of Information  
285 and Communications Technology and was conducted according to the Declaration of  
286 Helsinki. All participants provided written informed consent prior to participating in the  
287 experiment and were naïve to the purpose of the study.

288

### 289 *Apparatus*

290 All participants wore both eye patches and an eye mask to eliminate any possible visual  
291 stimuli ~30 min before the experiment began until the end. They were also instructed to  
292 close their eyes through the experiment. They sat in a comfortable reclining chair with  
293 their heads on a chinrest and legs extended on a leg rest. The height and location of the  
294 chinrest and the leg rest were adjusted for each participant so that they could comfortably  
295 make the rhythmic movements of alternating dorsiflexion and plantar flexion of their feet.  
296 The elevation angles of the first metatarsals of both feet from the horizontal plane were  
297 recorded using an electromagnetic position sensor (Micro Sensor 1.8 Extra Flex,  
298 Polhemus Liberty, Burlington, VT). The obtained data were digitized with a temporal  
299 sampling ratio of 240 Hz and then low-pass filtered with a cutoff frequency of 5 Hz.

300

301 Electromyographic (EMG) activity was recorded at 2,000 Hz utilizing surface electrodes  
302 from the medial and lateral heads of the gastrocnemius and tibialis anterior of both legs  
303 using wireless EMG sensors (Wave Plus Wireless EMG, Cometa, Bareggio, Italy). This  
304 EMG recording was prepared to capture possible muscle twitches with TMS. However,  
305 as we did not observe any twitches, EMG data are not reported in this study.

306

307 TMS stimulation was applied using a 70-mm figure-eight coil and a Magstim Rapid  
308 Transcranial Magnetic Stimulator (Magstim Company, Spring Gardens, UK). The  
309 maximum stimulator output was 2.1 T. TMS pulse delivery was controlled by an in-house  
310 program running on MATLAB, version R2013b (The MathWorks, Natick, MA).

311

### 312 *TMS protocol*

313 The stimulation sites for each participant were identified using an elastic swimming cap  
314 with 14 ( $2 \times 7$ ) markers (Fig. 1B). The marker positions were determined by a cap worn  
315 by a male individual with an average head size for Japanese men (head circumference:

316 ~57 cm; Kouchi and Mochimaru, 2008) who did not participate in the experiment. The  
317 markers were placed at inion, 2.5 cm (stimulation site #11), and 5 cm (stimulation site  
318 #4) dorsal from the inion on the median line (nasion-to-inion line through the vertex), and  
319 2, 4, and 6 cm right and left away from the median line at the same level as stimulation  
320 sites #4 and #11. Each participant wore the swimming cap on the head with 1) the inion  
321 mark placed at the participant's inion, 2) stimulation sites #4 and #11 aligned on the  
322 participant's median line, and 3) stimulation site #11 placed 2.5 cm dorsal from the inion  
323 to target V1/V2 (Fig. 1A) (Beckers and Zeki, 1995, Cowey and Walsh, 2000, Laycock et  
324 al., 2007, Salminen-Vaparanta et al., 2012).

325

326 Subsequently, the stimulation intensity for each participant was determined using the  
327 highest value that did not induce scalp pain in the individuals (Table 1). Single TMS  
328 pulses were applied to each stimulation site in order from sites #1 to #14. For stimulation  
329 site #1, stimulation was initially applied with 100% intensity of the stimulator output, and  
330 the intensity was decreased gradually by 5% until the participant reported no pain.  
331 Consequently, stimulation at each stimulation site was started with the highest intensity  
332 of stimulation that did not induce pain at the previous stimulation site. For each participant,  
333 the intensity of stimulation determined at stimulation site #14 was used as the stimulation  
334 intensity for the experiment.

335

### 336 *Task procedure*

337 The experiment was performed with the following task procedure. The participants were  
338 blindfolded and while sitting on the chair, made rhythmic alternative movements of  
339 dorsiflexion and plantar flexion of the feet without any sound cue. To keep the movement  
340 frequency as constant as possible, the participants practiced the movements with a sound  
341 frequency of 1 Hz for ~2 min twice: once before the determination process of the  
342 stimulation intensity and once before starting the experiment. They were instructed to  
343 maintain the consistent movement frequency throughout the experiment. No instructions  
344 were provided regarding the motion range of the foot movement.

345

346 In each experimental trial, the rhythmic movement was performed in each of the  
347 following three conditions. During the stimulation condition, 20 single TMS pulses were  
348 applied to one of the 14 stimulation sites at interstimulus intervals of 2–4 s (drawn from  
349 a uniform random distribution). The TMS coil was held tangentially to the scalp. The trial  
350 was started 3 s before the first stimulation and ended 3 s after the last stimulation. Each  
351 trial duration was 56.34–70.26 s. During the sham condition, a fake coil was placed over

352 stimulation site #11, while another coil delivered 20 single TMS pulses in the air near the  
353 fake coil. Thus, the participant could feel the clicking sound coming from the fake coil  
354 on the scalp. The duration and timing of the TMS pulses were determined according to  
355 the protocol used in the stimulation condition. During the no-stimulation condition, no  
356 coil was placed on the scalp, and the TMS pulses were not generated. The trial duration  
357 was set at 50 s.

358

359 The participants completed two blocks of 15 trials, including 14 stimulation trials (one  
360 for each of the 14 stimulation sites) and one sham trial. The trial order was  
361 pseudorandomized for each block. Each of the two no-stimulation trials was performed  
362 before the first block and after the second block. Thus, the participants completed a total  
363 of 32 experimental trials.

364

#### 365 *Data analysis*

366 The effects of TMS on movement were examined by evaluating the movement frequency.  
367 For each foot in each trial, the duration of each movement cycle was determined, defined  
368 as the time between the adjacent dorsiflexion peaks (Fig. 1A and see details in the next  
369 paragraph), and the SD of the durations was calculated from all the movement cycles.  
370 Then, the SD for each stimulation site was obtained by averaging the four SD values for  
371 left and right feet in the two stimulation trials (first and second blocks). Similarly, the SD  
372 for the no-stimulation trials was calculated as control. For stimulation site #14 of  
373 participant #23 (Table 1), data from only the second block were utilized to calculate the  
374 SD because of the lack of the first block data due to a recording error. For stimulation site  
375 #5 of participant #20, the second block data of the left foot were excluded as the foot  
376 posture changed significantly during the trial. Notably, the data from the sham trials were  
377 not analyzed since almost all the participants (22/24) noticed the lack of stimulation  
378 and/or felt something going wrong during the trials. Hence, the data were likely biased  
379 by this surprising effect. The primary interest of our analysis was in the data obtained  
380 from stimulation site #11, which was putative V1/V2 (pV1/V2, see TMS protocol). Our  
381 analysis in the main text focused on stimulation site #11. The other stimulation sites may  
382 cover broad visual areas, including early (V1/V2) and higher-order (V3, V4, and V5)  
383 visual areas, according to the literature (Cowey and Walsh, 2000, Pascual-Leone and  
384 Walsh, 2001, Salminen-Vaparanta et al., 2012, Amemiya et al., 2017). To observe the  
385 overall trend of the TMS effect on the early and higher-order visual cortices, the average  
386 SD of all the stimulation sites was analyzed, which is reported in supplementary Fig. S1.

387

388 The dorsiflexion peaks (Fig. 1A) for each foot of each trial were identified as follows.  
389 First, the time average of the elevation angle was calculated and subtracted from the entire  
390 time series to obtain the time series of a relative angle ( $\theta$  in Fig. 1A). Then, the crossing  
391 times where  $\theta$  changed from negative to positive were identified. Finally, the point of  
392 maximum value between each of the two consecutive crossing times was identified and  
393 defined as a peak. The identification code is available online (See Data availability).

394

#### 395 *Statistical analysis*

396 Statistical analyses were conducted as follows. The effects of TMS on stimulation site #  
397 11 (pV1/V2) were examined using a two-way mixed-design ANOVA on the SD with a  
398 within-subject factor of stimulation condition (no-stimulation vs. stimulation to pV1/V2)  
399 and a between-subject factor of group (blind vs. sighted). As a significant interaction was  
400 found, the effect of stimulus condition was examined within each group by a paired t-test,  
401 whereas the effect of group was examined within each stimulus condition by an unpaired  
402 t-test. The same ANOVA was conducted for the average SD of all the stimulation sites  
403 (Fig. S1). Since the blind group showed a significant increase in SD, correlation analyses  
404 were performed to examine the relationship of SD increase ( $\Delta$  SD in Table 2; SD in  
405 stimulation condition minus SD in no-stimulation condition) with age, age at onset of  
406 visual loss, and duration of visual loss. We reported Pearson's correlation coefficients and  
407 statistical  $p$ -values for the test of no correlation. In addition, to evaluate the relationship  
408 between SD increase and the participants' sports experience, the athlete ( $BL^A$  in Table 1)  
409 and nonathlete ( $BL^{NA}$ ) blind subgroups were compared using an unpaired  $t$ -test. The  
410 analyses were conducted in MATLAB version R2018b (The MathWorks, Natick, MA).  
411 The significance level was set at 0.05 in all the analyses. All t-tests were two-tailed, and  
412 the Bonferroni correction was used for multiple comparisons. All data have been  
413 presented as mean  $\pm$  standard deviation for all the participants.

414

#### 415 *Data availability*

416 Data and codes to reproduce Figs. 2, S1, and S2 and the related analyses are available  
417 from <https://github.com/ikegami244/Blind-TMS>. The code to identify the peaks is also  
418 available from the same repository.

419

420

421 **References**

- 422 AMADEO, M. B., STORMER, V. S., CAMPUS, C. & GORI, M. 2019. Peripheral sounds elicit  
423 stronger activity in contralateral occipital cortex in blind than sighted individuals. *Sci Rep*,  
424 9, 11637.
- 425 AMEDI, A., FLOEL, A., KNECHT, S., ZOHARY, E. & COHEN, L. G. 2004. Transcranial  
426 magnetic stimulation of the occipital pole interferes with verbal processing in blind  
427 subjects. *Nat Neurosci*, 7, 1266-70.
- 428 AMEDI, A., RAZ, N., PIANKA, P., MALACH, R. & ZOHARY, E. 2003. Early 'visual' cortex  
429 activation correlates with superior verbal memory performance in the blind. *Nat Neurosci*,  
430 6, 758-66.
- 431 AMEMIYA, T., BECK, B., WALSH, V., GOMI, H. & HAGGARD, P. 2017. Visual area V5/hMT+  
432 contributes to perception of tactile motion direction: a TMS study. *Sci Rep*, 7, 40937.
- 433 BECKERS, G. & ZEKI, S. 1995. The consequences of inactivating areas V1 and V5 on visual  
434 motion perception. *Brain*, 118 ( Pt 1), 49-60.
- 435 BEDNY, M., PASCUAL-LEONE, A., DODELL-FEDER, D., FEDORENKO, E. & SAXE, R. 2011.  
436 Language processing in the occipital cortex of congenitally blind adults. *Proc Natl Acad*  
437 *Sci U S A*, 108, 4429-34.
- 438 BEDNY, M., PASCUAL-LEONE, A., DRAVIDA, S. & SAXE, R. 2012. A sensitive period for  
439 language in the visual cortex: distinct patterns of plasticity in congenitally versus late blind  
440 adults. *Brain Lang*, 122, 162-70.
- 441 BRADDICK, O. 1996. Binocularity in infancy. *Eye (Lond)*, 10 ( Pt 2), 182-8.
- 442 BUARON, B., REZNIK, D., GILRON, R. & MUKAMEL, R. 2020. Voluntary Actions Modulate  
443 Perception and Neural Representation of Action-Consequences in a Hand-Dependent  
444 Manner. *Cereb Cortex*, 30, 6097-6107.
- 445 BURTON, H. 2003. Visual cortex activity in early and late blind people. *J Neurosci*, 23, 4005-11.
- 446 BURTON, H., SNYDER, A. Z., CONTURO, T. E., AKBUDAK, E., OLLINGER, J. M. &  
447 RAICHLE, M. E. 2002. Adaptive changes in early and late blind: a fMRI study of Braille  
448 reading. *J Neurophysiol*, 87, 589-607.
- 449 CASTALDI, E., LUNGI, C. & MORRONE, M. C. 2020. Neuroplasticity in adult human visual  
450 cortex. *Neurosci Biobehav Rev*, 112, 542-552.
- 451 COHEN, L. G., CELNIK, P., PASCUAL-LEONE, A., CORWELL, B., FALZ, L., DAMBROSIA,  
452 J., HONDA, M., SADATO, N., GERLOFF, C., CATALA, M. D. & HALLETT, M. 1997.  
453 Functional relevance of cross-modal plasticity in blind humans. *Nature*, 389, 180-3.
- 454 COWEY, A. & WALSH, V. 2000. Magnetically induced phosphenes in sighted, blind and  
455 blindsighted observers. *Neuroreport*, 11, 3269-73.
- 456 DIEDRICHSEN, J., SHADMEHR, R. & IVRY, R. B. 2010. The coordination of movement:

- 457 optimal feedback control and beyond. *Trends Cogn Sci*, 14, 31-9.
- 458 DUECKER, F. & SACK, A. T. 2015. Rethinking the role of sham TMS. *Front Psychol*, 6, 210.
- 459 ENGLUND, M., FARIDJOO, S., IYER, C. S. & KRUBITZER, L. 2020. Available Sensory Input  
460 Determines Motor Performance and Strategy in Early Blind and Sighted Short-Tailed  
461 Opossums. *iScience*, 23, 101527.
- 462 FINE, I. & PARK, J. M. 2018. Blindness and Human Brain Plasticity. *Annu Rev Vis Sci*, 4, 337-  
463 356.
- 464 FOLTYS, H., SPARING, R., BOROOJERDI, B., KRINGS, T., MEISTER, I. G., MOTTAGHY, F.  
465 M. & TOPPER, R. 2001. Motor control in simple bimanual movements: a transcranial  
466 magnetic stimulation and reaction time study. *Clin Neurophysiol*, 112, 265-74.
- 467 GALLIVAN, J. P., CHAPMAN, C. S., GALE, D. J., FLANAGAN, J. R. & CULHAM, J. C. 2019.  
468 Selective Modulation of Early Visual Cortical Activity by Movement Intention. *Cereb*  
469 *Cortex*, 29, 4662-4678.
- 470 GOLDREICH, D. & KANICS, I. M. 2003. Tactile acuity is enhanced in blindness. *J Neurosci*, 23,  
471 3439-45.
- 472 HOLIG, C., FOCKER, J., BEST, A., RODER, B. & BUCHEL, C. 2014. Crossmodal plasticity in  
473 the fusiform gyrus of late blind individuals during voice recognition. *Neuroimage*, 103,  
474 374-382.
- 475 IKEGAMI, T. & GANESH, G. 2017. Shared Mechanisms in the Estimation of Self-Generated  
476 Actions and the Prediction of Other's Actions by Humans. *eNeuro*, 4.
- 477 KANAKOGI, Y. & ITAKURA, S. 2011. Developmental correspondence between action prediction  
478 and motor ability in early infancy. *Nat Commun*, 2, 341.
- 479 KANJLIA, S., LANE, C., FEIGENSON, L. & BEDNY, M. 2016. Absence of visual experience  
480 modifies the neural basis of numerical thinking. *Proc Natl Acad Sci U S A*, 113, 11172-  
481 11177.
- 482 KELLER, G. B., BONHOEFFER, T. & HUBENER, M. 2012. Sensorimotor mismatch signals in  
483 primary visual cortex of the behaving mouse. *Neuron*, 74, 809-15.
- 484 KOUCHI, M. & MOCHIMARU, M. 2008. Anthropometric database of Japanese head 2001.  
485 National Institute of Advanced Industrial Science and Technology.
- 486 KUJALA, T., ALHO, K., KEKONI, J., HAMALAINEN, H., REINIKAINEN, K., SALONEN, O.,  
487 STANDERTSKJOLD-NORDENSTAM, C. G. & NAATANEN, R. 1995. Auditory and  
488 somatosensory event-related brain potentials in early blind humans. *Exp Brain Res*, 104,  
489 519-26.
- 490 LAYCOCK, R., CREWETHER, D. P., FITZGERALD, P. B. & CREWETHER, S. G. 2007. Evidence  
491 for fast signals and later processing in human V1/V2 and V5/MT+: A TMS study of  
492 motion perception. *J Neurophysiol*, 98, 1253-62.



- 493 LEINWEBER, M., WARD, D. R., SOBCZAK, J. M., ATTINGER, A. & KELLER, G. B. 2017. A  
494 Sensorimotor Circuit in Mouse Cortex for Visual Flow Predictions. *Neuron*, 96, 1204.
- 495 LESSARD, N., PARE, M., LEPORE, F. & LASSONDE, M. 1998. Early-blind human subjects  
496 localize sound sources better than sighted subjects. *Nature*, 395, 278-80.
- 497 MAWASE, F., UEHARA, S., BASTIAN, A. J. & CELNIK, P. 2017. Motor Learning Enhances Use-  
498 Dependent Plasticity. *J Neurosci*, 37, 2673-2685.
- 499 MERABET, L. B. & PASCUAL-LEONE, A. 2010. Neural reorganization following sensory loss:  
500 the opportunity of change. *Nat Rev Neurosci*, 11, 44-52.
- 501 MERABET, L. B., RIZZO, J. F., AMEDI, A., SOMERS, D. C. & PASCUAL-LEONE, A. 2005.  
502 What blindness can tell us about seeing again: merging neuroplasticity and  
503 neuroprostheses. *Nat Rev Neurosci*, 6, 71-7.
- 504 ORBAN DE XIVRY, J. J., CRISCIMAGNA-HEMMINGER, S. E. & SHADMEHR, R. 2011a.  
505 Contributions of the motor cortex to adaptive control of reaching depend on the  
506 perturbation schedule. *Cereb Cortex*, 21, 1475-84.
- 507 ORBAN DE XIVRY, J. J., MARKO, M. K., PEKONY, S. E., PASTOR, D., IZAWA, J., CELNIK, P.  
508 & SHADMEHR, R. 2011b. Stimulation of the human motor cortex alters generalization  
509 patterns of motor learning. *J Neurosci*, 31, 7102-10.
- 510 PASCUAL-LEONE, A. & WALSH, V. 2001. Fast backprojections from the motion to the primary  
511 visual area necessary for visual awareness. *Science*, 292, 510-2.
- 512 PIETRINI, P., FUREY, M. L., RICCIARDI, E., GOBBINI, M. I., WU, W. H., COHEN, L.,  
513 GUAZZELLI, M. & HAXBY, J. V. 2004. Beyond sensory images: Object-based  
514 representation in the human ventral pathway. *Proc Natl Acad Sci U S A*, 101, 5658-63.
- 515 PTITO, M., FUMAL, A., DE NOORDHOUT, A. M., SCHOENEN, J., GJEDDE, A. & KUPERS,  
516 R. 2008. TMS of the occipital cortex induces tactile sensations in the fingers of blind  
517 Braille readers. *Exp Brain Res*, 184, 193-200.
- 518 RODER, B., TEDER-SALEJARVI, W., STERR, A., ROSLER, F., HILLYARD, S. A. & NEVILLE,  
519 H. J. 1999. Improved auditory spatial tuning in blind humans. *Nature*, 400, 162-6.
- 520 SADATO, N., PASCUAL-LEONE, A., GRAFMAN, J., IBANEZ, V., DEIBER, M. P., DOLD, G.  
521 & HALLETT, M. 1996. Activation of the primary visual cortex by Braille reading in blind  
522 subjects. *Nature*, 380, 526-8.
- 523 SALEEM, A. B., AYAZ, A., JEFFERY, K. J., HARRIS, K. D. & CARANDINI, M. 2013. Integration  
524 of visual motion and locomotion in mouse visual cortex. *Nat Neurosci*, 16, 1864-9.
- 525 SALMINEN-VAPARANTA, N., NOREIKA, V., REVONSUO, A., KOIVISTO, M. & VANNI, S.  
526 2012. Is selective primary visual cortex stimulation achievable with TMS? *Hum Brain*  
527 *Mapp*, 33, 652-65.
- 528 SCOTT, S. H. 2004. Optimal feedback control and the neural basis of volitional motor control.

- 529           *Nat Rev Neurosci*, 5, 532-46.
- 530 SHADMEHR, R., SMITH, M. A. & KRAKAUER, J. W. 2010. Error correction, sensory prediction,  
531           and adaptation in motor control. *Annu Rev Neurosci*, 33, 89-108.
- 532 TAKEI, T., LOMBER, S. G., COOK, D. J. & SCOTT, S. H. 2021. Transient deactivation of dorsal  
533           premotor cortex or parietal area 5 impairs feedback control of the limb in macaques. *Curr*  
534           *Biol*, 31, 1476-1487 e5.
- 535 TODOROV, E. & JORDAN, M. I. 2002. Optimal feedback control as a theory of motor  
536           coordination. *Nat Neurosci*, 5, 1226-35.
- 537 VETTER, P., BOLA, L., REICH, L., BENNETT, M., MUCKLI, L. & AMEDI, A. 2020. Decoding  
538           Natural Sounds in Early "Visual" Cortex of Congenitally Blind Individuals. *Curr Biol*, 30,  
539           3039-3044 e2.
- 540 VOSS, P. 2013. Sensitive and critical periods in visual sensory deprivation. *Front Psychol*, 4, 664.
- 541 VOSS, P., GOUGOUX, F., LASSONDE, M., ZATORRE, R. J. & LEPORE, F. 2006. A positron  
542           emission tomography study during auditory localization by late-onset blind individuals.  
543           *Neuroreport*, 17, 383-8.
- 544 VOSS, P., LASSONDE, M., GOUGOUX, F., FORTIN, M., GUILLEMOT, J. P. & LEPORE, F.  
545           2004. Early- and late-onset blind individuals show supra-normal auditory abilities in far-  
546           space. *Curr Biol*, 14, 1734-8.
- 547 WEEKS, R., HORWITZ, B., AZIZ-SULTAN, A., TIAN, B., WESSINGER, C. M., COHEN, L. G.,  
548           HALLETT, M. & RAUSCHECKER, J. P. 2000. A positron emission tomographic study of  
549           auditory localization in the congenitally blind. *J Neurosci*, 20, 2664-72.
- 550 WOLPERT, D. M. & FLANAGAN, J. R. 2001. Motor prediction. *Curr Biol*, 11, R729-32.
- 551 WOODWARD, A. L. 1998. Infants selectively encode the goal object of an actor's reach. *Cognition*,  
552           69, 1-34.
- 553
- 554

555 **Tables**

556 **Table 1. Characteristics of the participants**

| Partici<br>pant<br># | Group            | Age<br>(y) | Onset of<br>blindness<br>(y) | Cause of<br>blindness             | Light<br>sensitivity<br>at present | TMS<br>intensity<br>(%) |
|----------------------|------------------|------------|------------------------------|-----------------------------------|------------------------------------|-------------------------|
| 1                    | BL <sup>A</sup>  | 26         | 2                            | retinoblastoma                    | none                               | 80                      |
| 2                    | BL <sup>A</sup>  | 27         | 14                           | retinal choroidal<br>degeneration | yes                                | 75                      |
| 3                    | BL <sup>A</sup>  | 39         | 20                           | morning glory<br>anomaly          | none                               | 85                      |
| 4                    | BL <sup>A</sup>  | 28         | 23                           | uveitis                           | yes                                | 90                      |
| 5                    | BL <sup>A</sup>  | 20         | 1                            | retinoblastoma                    | none                               | 75                      |
| 6                    | BL <sup>A</sup>  | 40         | 25                           | retinitis<br>pigmentosa           | yes                                | 85                      |
| 7                    | BL <sup>NA</sup> | 25         | 14                           | chorioretinal<br>atrophy          | yes                                | 70                      |
| 8                    | BL <sup>NA</sup> | 25         | 5                            | glaucoma                          | none                               | 65                      |
| 9                    | BL <sup>NA</sup> | 42         | 17                           | uveitis +<br>glaucoma             | occasional                         | 70                      |
| 10                   | BL <sup>NA</sup> | 19         | 2                            | behcet's disease                  | none                               | 100                     |
| 11                   | BL <sup>NA</sup> | 20         | 3                            | retinal cell death                | none                               | 75                      |
| 12                   | BL <sup>NA</sup> | 19         | 15                           | glaucoma                          | none                               | 55                      |
| 13                   | SI               | 22         | -                            | -                                 | -                                  | 85                      |
| 14                   | SI               | 22         | -                            | -                                 | -                                  | 85                      |
| 15                   | SI               | 23         | -                            | -                                 | -                                  | 95                      |
| 16                   | SI               | 22         | -                            | -                                 | -                                  | 90                      |
| 17                   | SI               | 34         | -                            | -                                 | -                                  | 70                      |
| 18                   | SI               | 35         | -                            | -                                 | -                                  | 85                      |
| 19                   | SI               | 40         | -                            | -                                 | -                                  | 80                      |
| 20                   | SI               | 26         | -                            | -                                 | -                                  | 75                      |
| 21                   | SI               | 23         | -                            | -                                 | -                                  | 70                      |
| 22                   | SI               | 27         | -                            | -                                 | -                                  | 100                     |
| 23                   | SI               | 20         | -                            | -                                 | -                                  | 95                      |
| 24                   | SI               | 39         | -                            | -                                 | -                                  | 85                      |

557 *BL, blind; SI, sighted; y, year. Superscripts A and NA indicate athlete and nonathlete blind*  
 558 *participants, respectively.*

559 **Table 2. SD values in non-stimulation condition (no-stim) and stimulation-to-**  
560 **pV1/V2 condition (stimulation site #11) and the increase in SD for each group**

|                        | $SD_{no-stim}$                      | $SD_{pV1/V2}$                       | $\Delta SD$                          |
|------------------------|-------------------------------------|-------------------------------------|--------------------------------------|
| <b>BL (n=12)</b>       | <b><math>0.072 \pm 0.045</math></b> | <b><math>0.085 \pm 0.043</math></b> | <b><math>0.013 \pm 0.017</math></b>  |
| BL <sup>A</sup> (n=6)  | $0.049 \pm 0.013$                   | $0.063 \pm 0.026$                   | $0.013 \pm 0.019$                    |
| BL <sup>NA</sup> (n=6) | $0.095 \pm 0.055$                   | $0.108 \pm 0.045$                   | $0.013 \pm 0.018$                    |
| <b>SI (n=12)</b>       | <b><math>0.106 \pm 0.048</math></b> | <b><math>0.104 \pm 0.043</math></b> | <b><math>-0.002 \pm 0.019</math></b> |

561 *BL, blind; SI, sighted; y, year. Superscripts A and NA indicate athlete and nonathlete*

562 *blind participants, respectively.  $\Delta SD = SD_{pV1/V2} - SD_{no-stim}$ . All data are reported as*

563 *mean  $\pm$  standard deviation across participants. The units are seconds.*

564

565 **Figures**

566

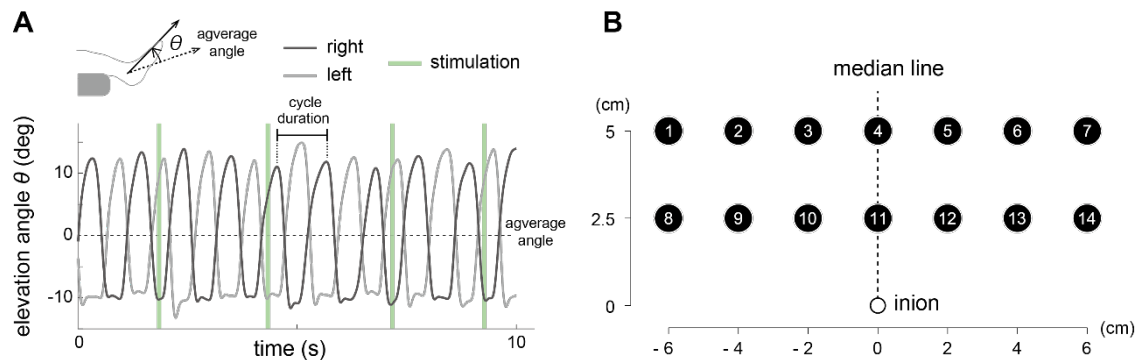

568

569 Fig. 1. The experiment and stimulation sites: A) The rhythmic foot movement of a  
570 representative participant for a 10-s period is shown by the elevation angle,  $\theta$  of right foot  
571 (dark gray line) and left foot (light gray line). For each foot in each trial,  $\theta$  is defined as  
572 the angle relative to the average angle of the trial ( $\theta = 0$ , dashed line). Each light-green  
573 vertical line indicates the timing of a single transcranial magnetic stimulation (TMS)  
574 pulse delivered at random. The cycle duration was defined as the time between the  
575 adjacent dorsiflexion peaks. The SD of the cycle durations was calculated for each foot  
576 in each trial (see Methods). B) Fourteen stimulation sites arranged in a  $2 \times 7$  grid were  
577 identified for each participant using the inion and the median line as reference points (see  
578 Methods). Stimulation site #11 corresponds to putative primary and secondary visual  
579 cortex (pV1/V2).

580

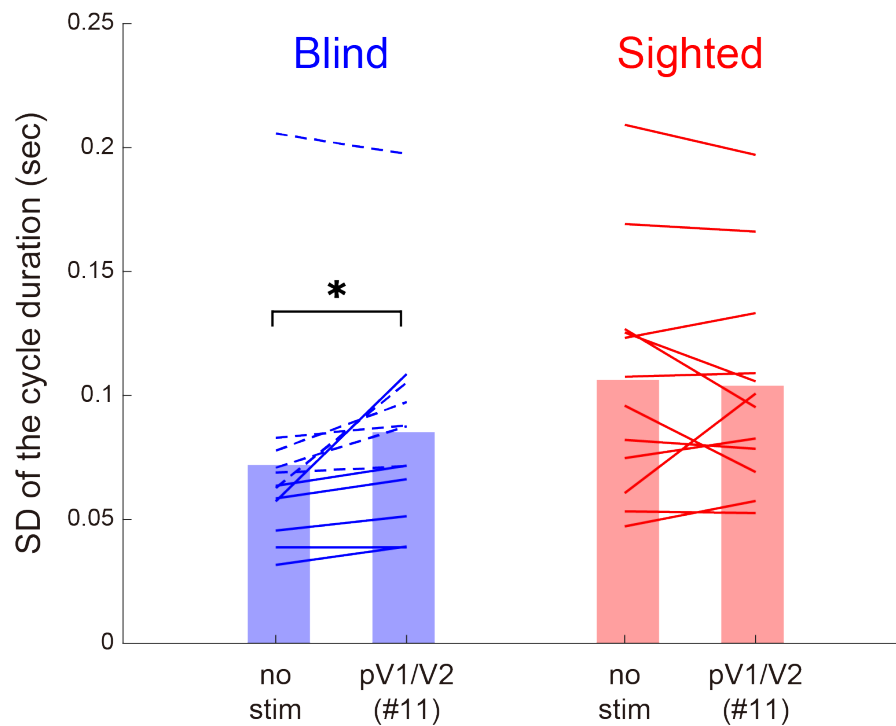

582

583 Fig. 2. SD of the cycle duration for blind (blue) and sighted (red) participants. The SD  
584 was compared between the no-stimulation condition (no-stim) and the stimulation  
585 condition in which TMS was applied over pV1/V2 (stimulation site #11). Each line  
586 represents data from an individual participant. For the blind participants, solid blue lines  
587 and dashed lines indicate subgroups of athletes (BL<sup>A</sup>) and nonathletes (BL<sup>NA</sup>),  
588 respectively. Bars indicate the mean. The asterisk indicates  $p < 0.05$ .

589

590



591 **SUPPLEMENTARY INFORMATION**

592 **Supplementary figures**

593

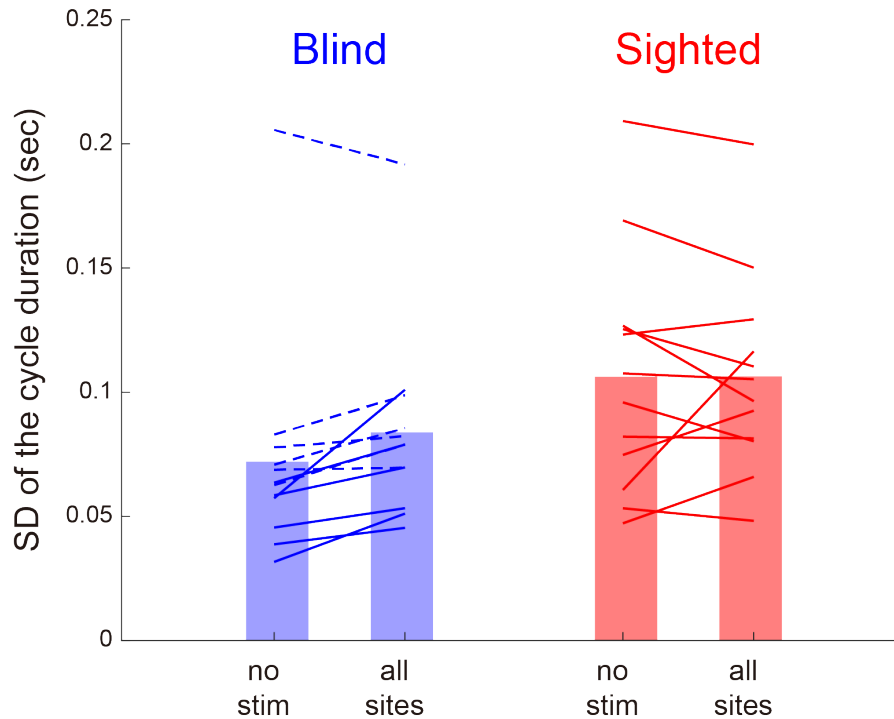

595

596 Fig. S1. SD of the cycle duration for blind (blue) and sighted (red) groups. The average  
597 SD over all stimulation sites was compared with the SD in the no-stimulation condition  
598 (no-stim). Each line represents data from an individual participant. For the blind group,  
599 solid blue lines and dashed lines indicate the subgroups of athletes (B<sup>LA</sup>) and nonathletes  
600 (B<sup>NA</sup>), respectively. Bars indicate the mean.

601

602

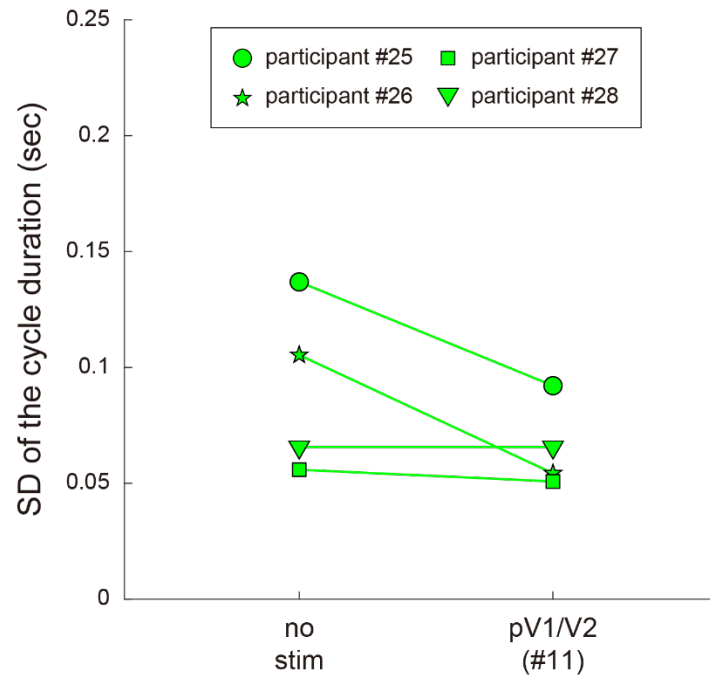

604

605 Fig. S2. SD of the cycle duration for congenitally blind participants for the no-stimulation  
606 condition (no stim) and the stimulation condition in which TMS was applied over pV1/V2  
607 (stimulation site #11). Four congenitally blind participants, who had never experienced  
608 vision (CBL), participated in this supplementary experiment (see Supplementary Table  
609 S1). Each line represents data from an individual participant. In contrast to the result from  
610 the acquired blind participants (Fig. 2), TMS of pV1/V2 did not induce an evident  
611 increase in SD of the cycle duration relative to the no-stimulation condition in all of the  
612 participants.

613

614

615

616 **Supplementary tables**

617 **Table S1. Characteristics of the congenitally blind participants**

| Partici<br>pant<br># | Group | Age<br>(y) | Onset of<br>blindness<br>(y) | Cause of<br>blindness                             | Light<br>sensitivity<br>at present | TMS<br>intensity<br>(%) |
|----------------------|-------|------------|------------------------------|---------------------------------------------------|------------------------------------|-------------------------|
| 25                   | CBL   | 29         | birth                        | unknown                                           | none                               | 80                      |
| 26                   | CBL   | 40         | birth                        | cataract                                          | none                               | 95                      |
| 27                   | CBL   | 36         | birth                        | anophthalmia +<br>persistent fetal<br>vasculature | none                               | 60                      |
| 28                   | CBL   | 32         | birth                        | amaurosis                                         | yes                                | 75                      |

618 *CBL, congenitally blind; y, year.*

619

620

621 **Table S2. SD values in non-stimulation trial (no-stim) and stimulation trial for**  
622 **pV1/V2 (stimulation site #11) and the increase for congenitally blind participants**

|                 | $SD_{no-stim}$ | $SD_{pV1/V2}$ | $\Delta SD$ |
|-----------------|----------------|---------------|-------------|
| Participant #25 | 0.137          | 0.092         | -0.045      |
| Participant #26 | 0.105          | 0.054         | -0.051      |
| Participant #27 | 0.056          | 0.051         | -0.005      |
| Participant #28 | 0.066          | 0.066         | 0.000       |

623  $\Delta SD = SD_{pV1/V2} - SD_{no-stim}$ . *The units are seconds.*

624
